# Supplementary material for: A highly enantioselective Mannich reaction of aldehydes with cyclic N-acyliminium ions by synergistic catalysis
Source: Royal Society of Chemistry journal article supplement (doi:10.1039/c5cc04416b), 2015-01-01

## Determination of regio- and diastereoselectivity by $^1\text{H}$ NMR

The regio- and diastereoselectivity was calculated on the aldehydic protons in  $^1\text{H}$  NMR of the reaction crude mixture as shown.

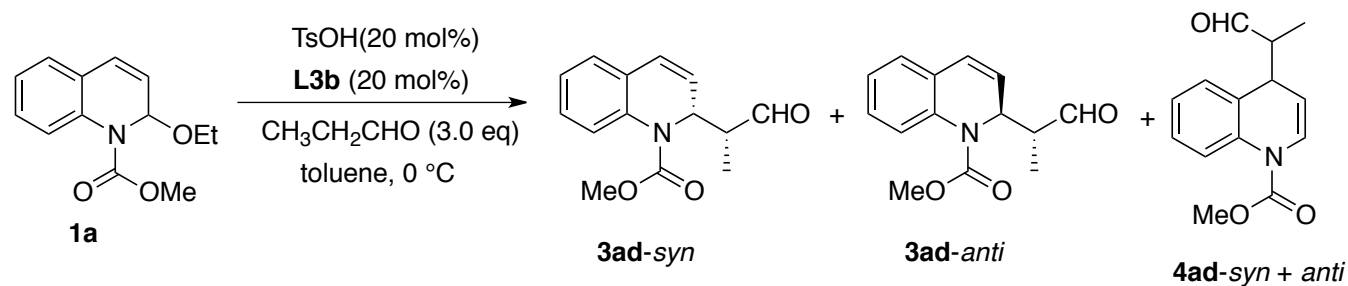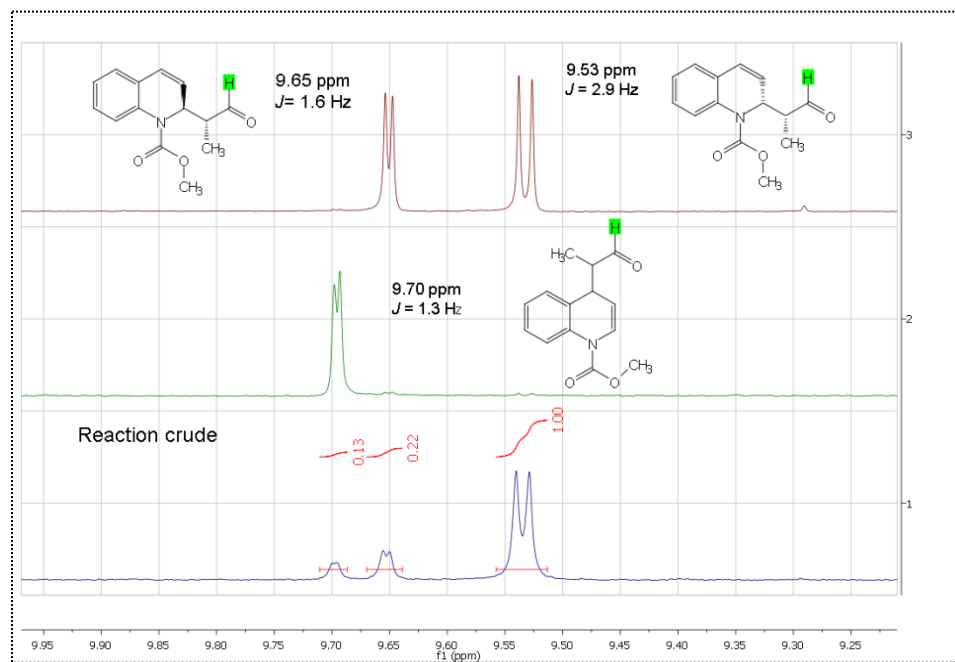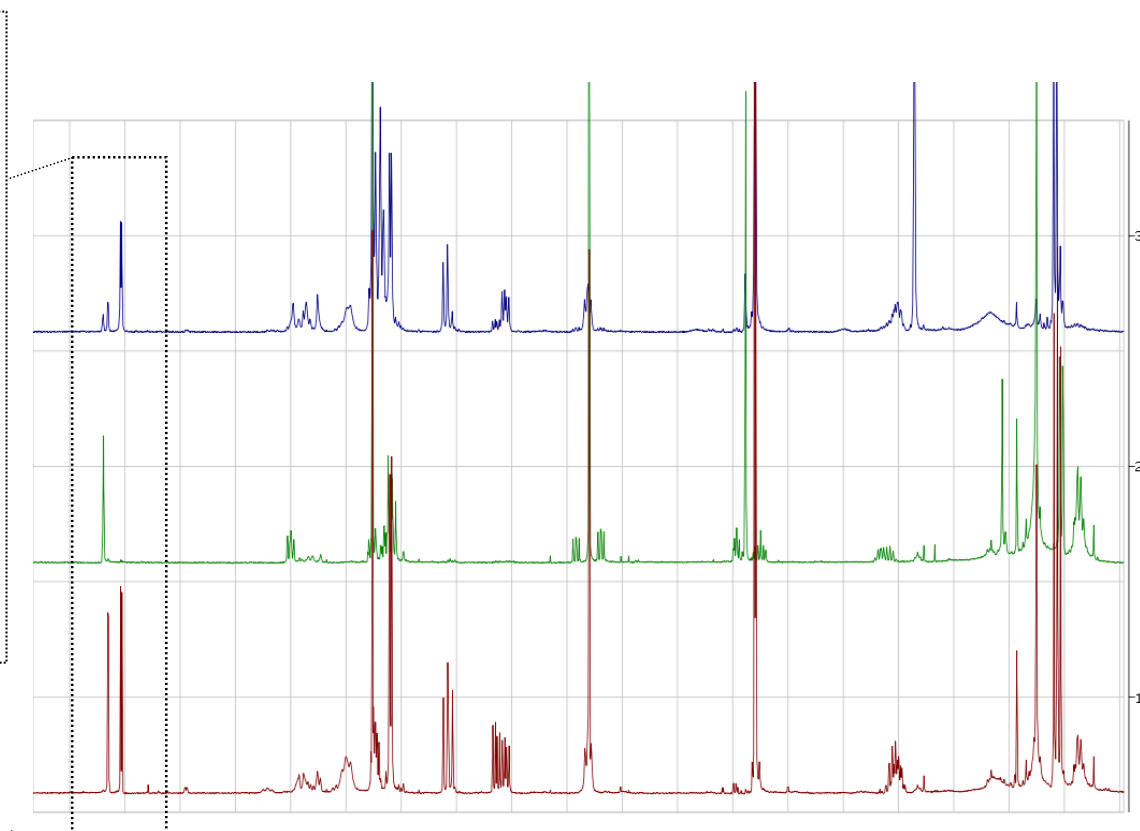

When the reaction was carried with in situ reduction to the corresponding alcohols, the regio- and diastereoselectivity was calculated on the double bond protons in the  $^1\text{H}$  NMR of the reaction crude.

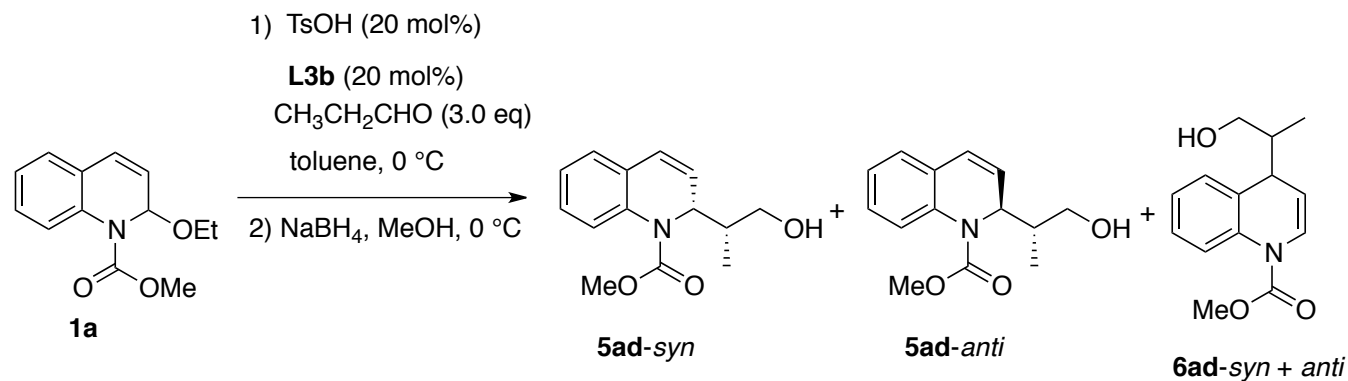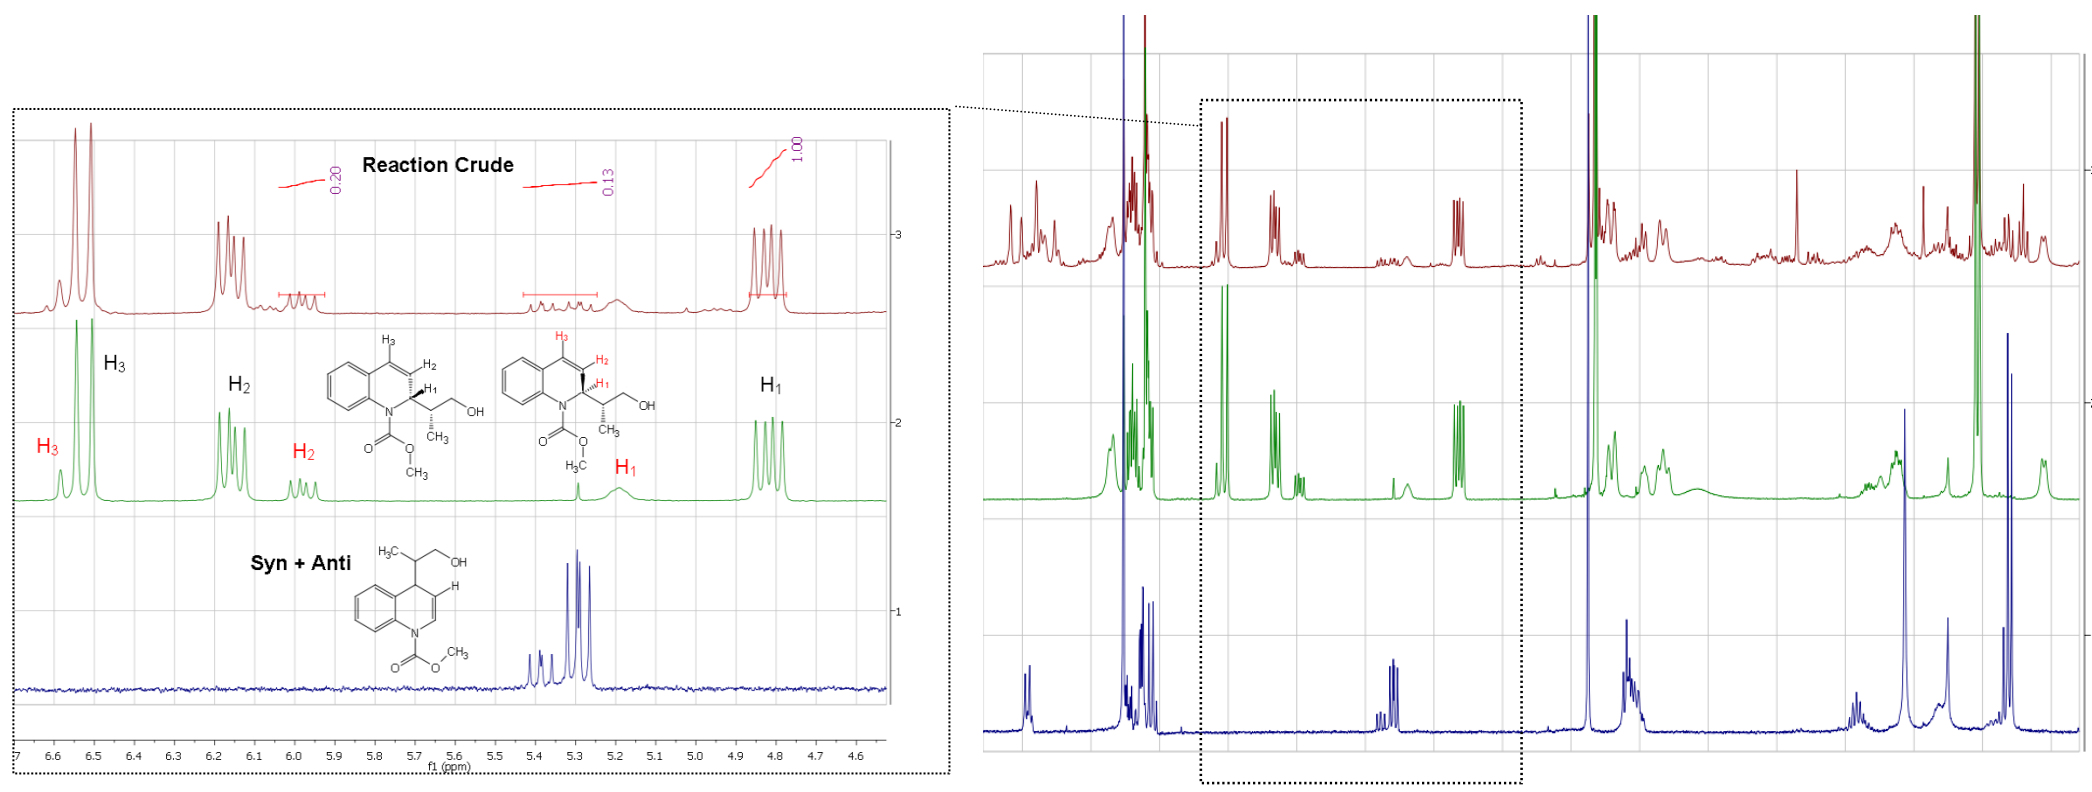

Supplement: c5cc04416b1.pdf [file c5cc04416b1.pdf]
